# Supplementary material
Source: PubMed Central journal article supplement (PMC5071782)

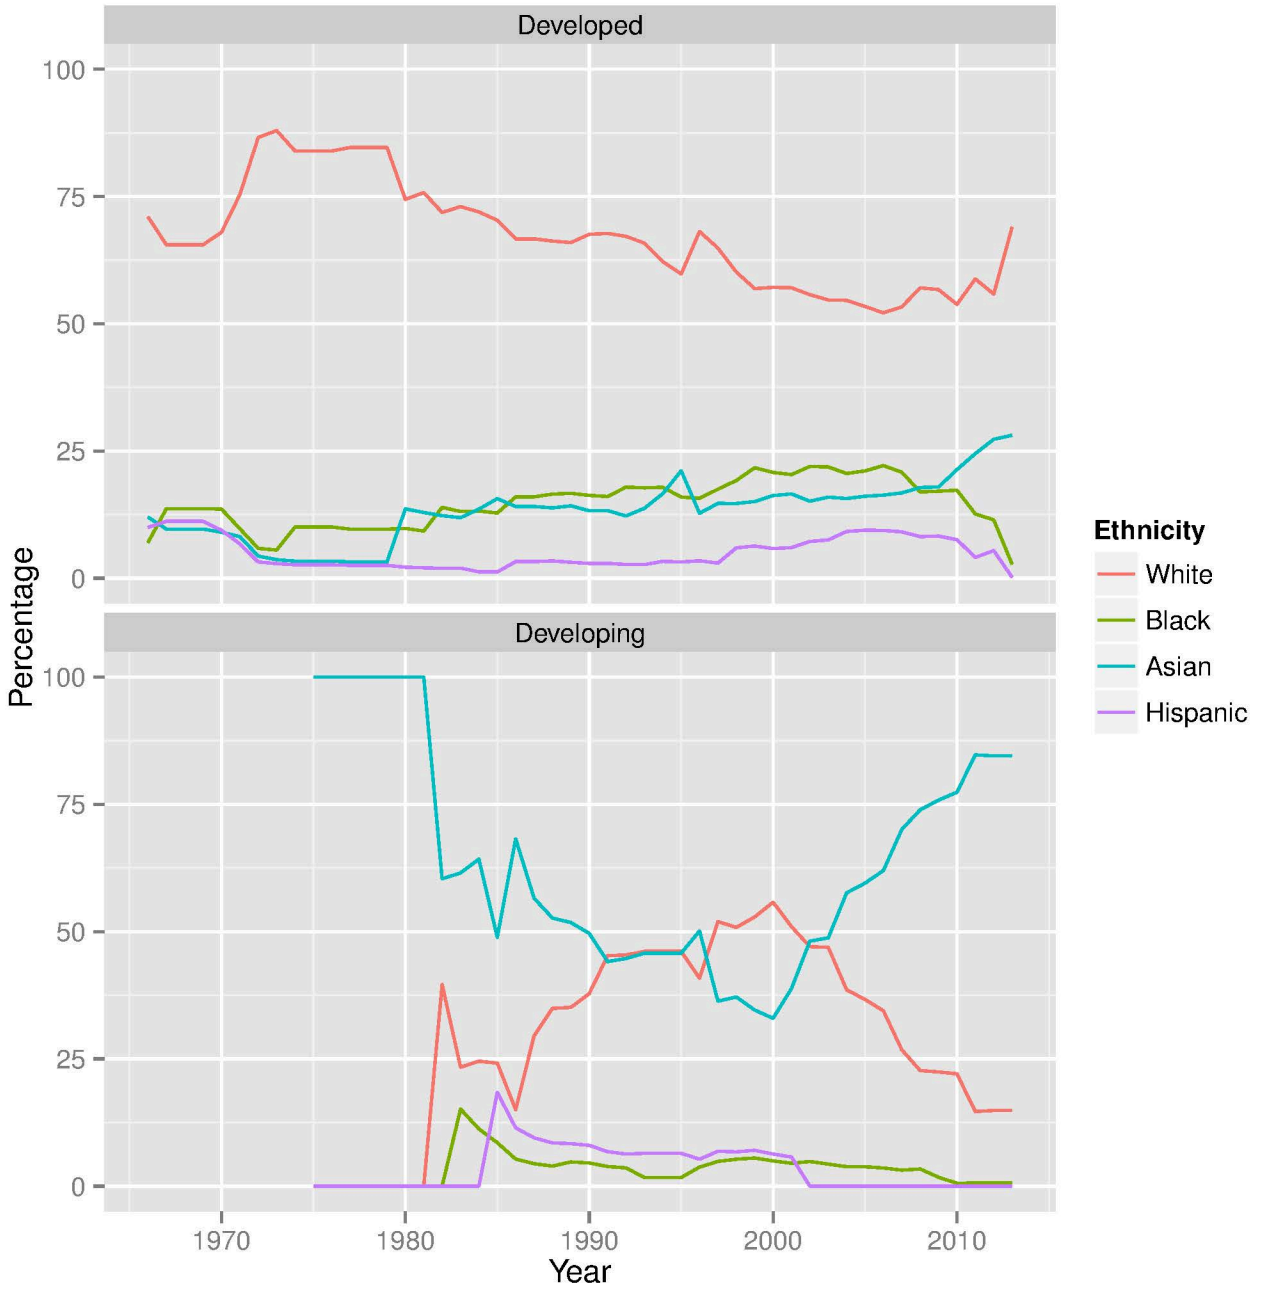

Supplement: NIHMS822822-supplement-Sup_fig1.pdf [file NIHMS822822-supplement-Sup_fig1.pdf]

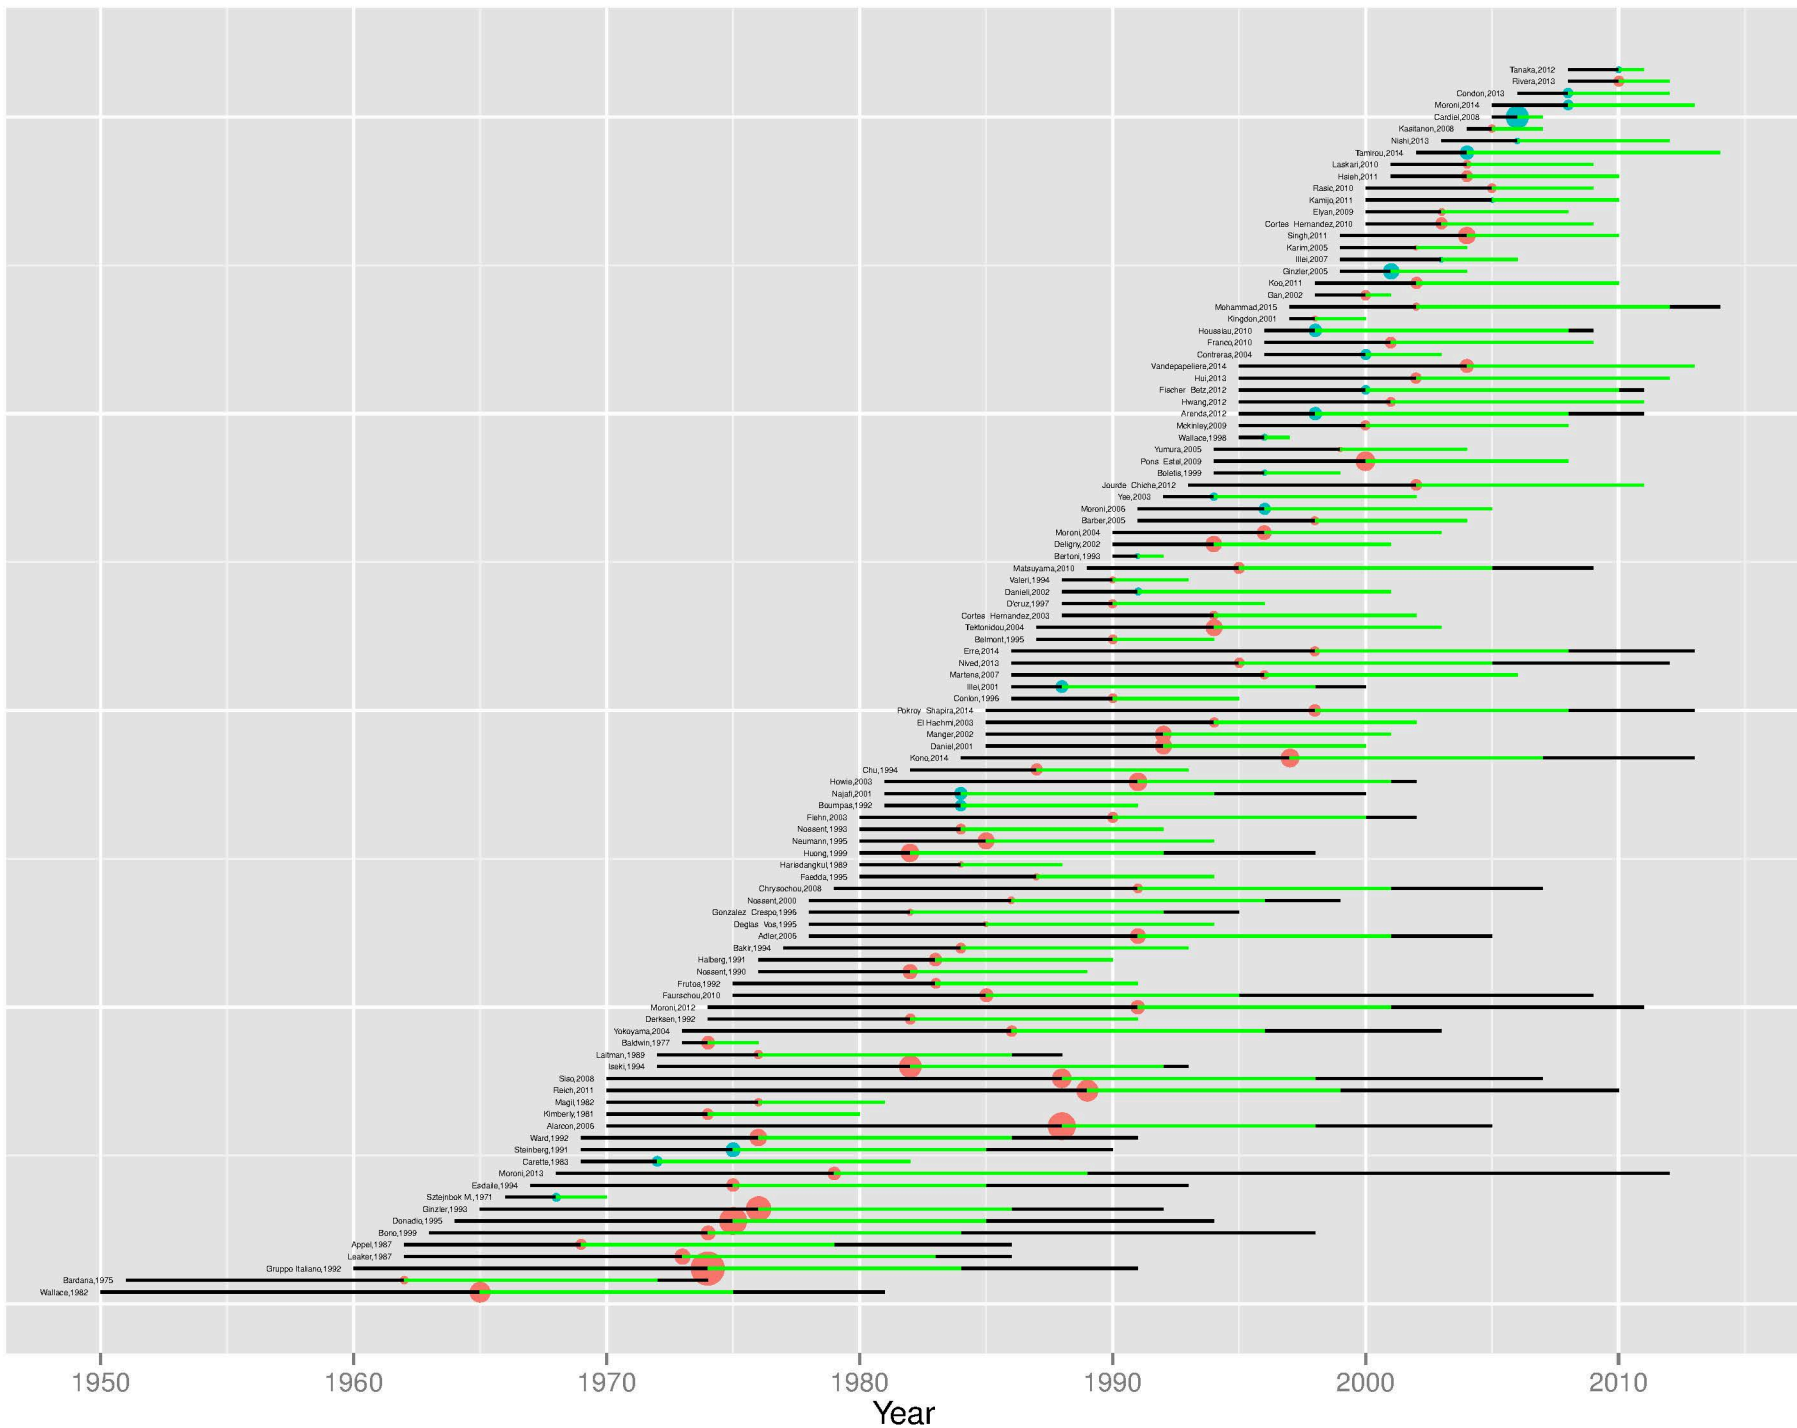

Design • Observational • Trial

Supplement: NIHMS822822-supplement-Sup_fig2a.pdf [file NIHMS822822-supplement-Sup_fig2a.pdf]

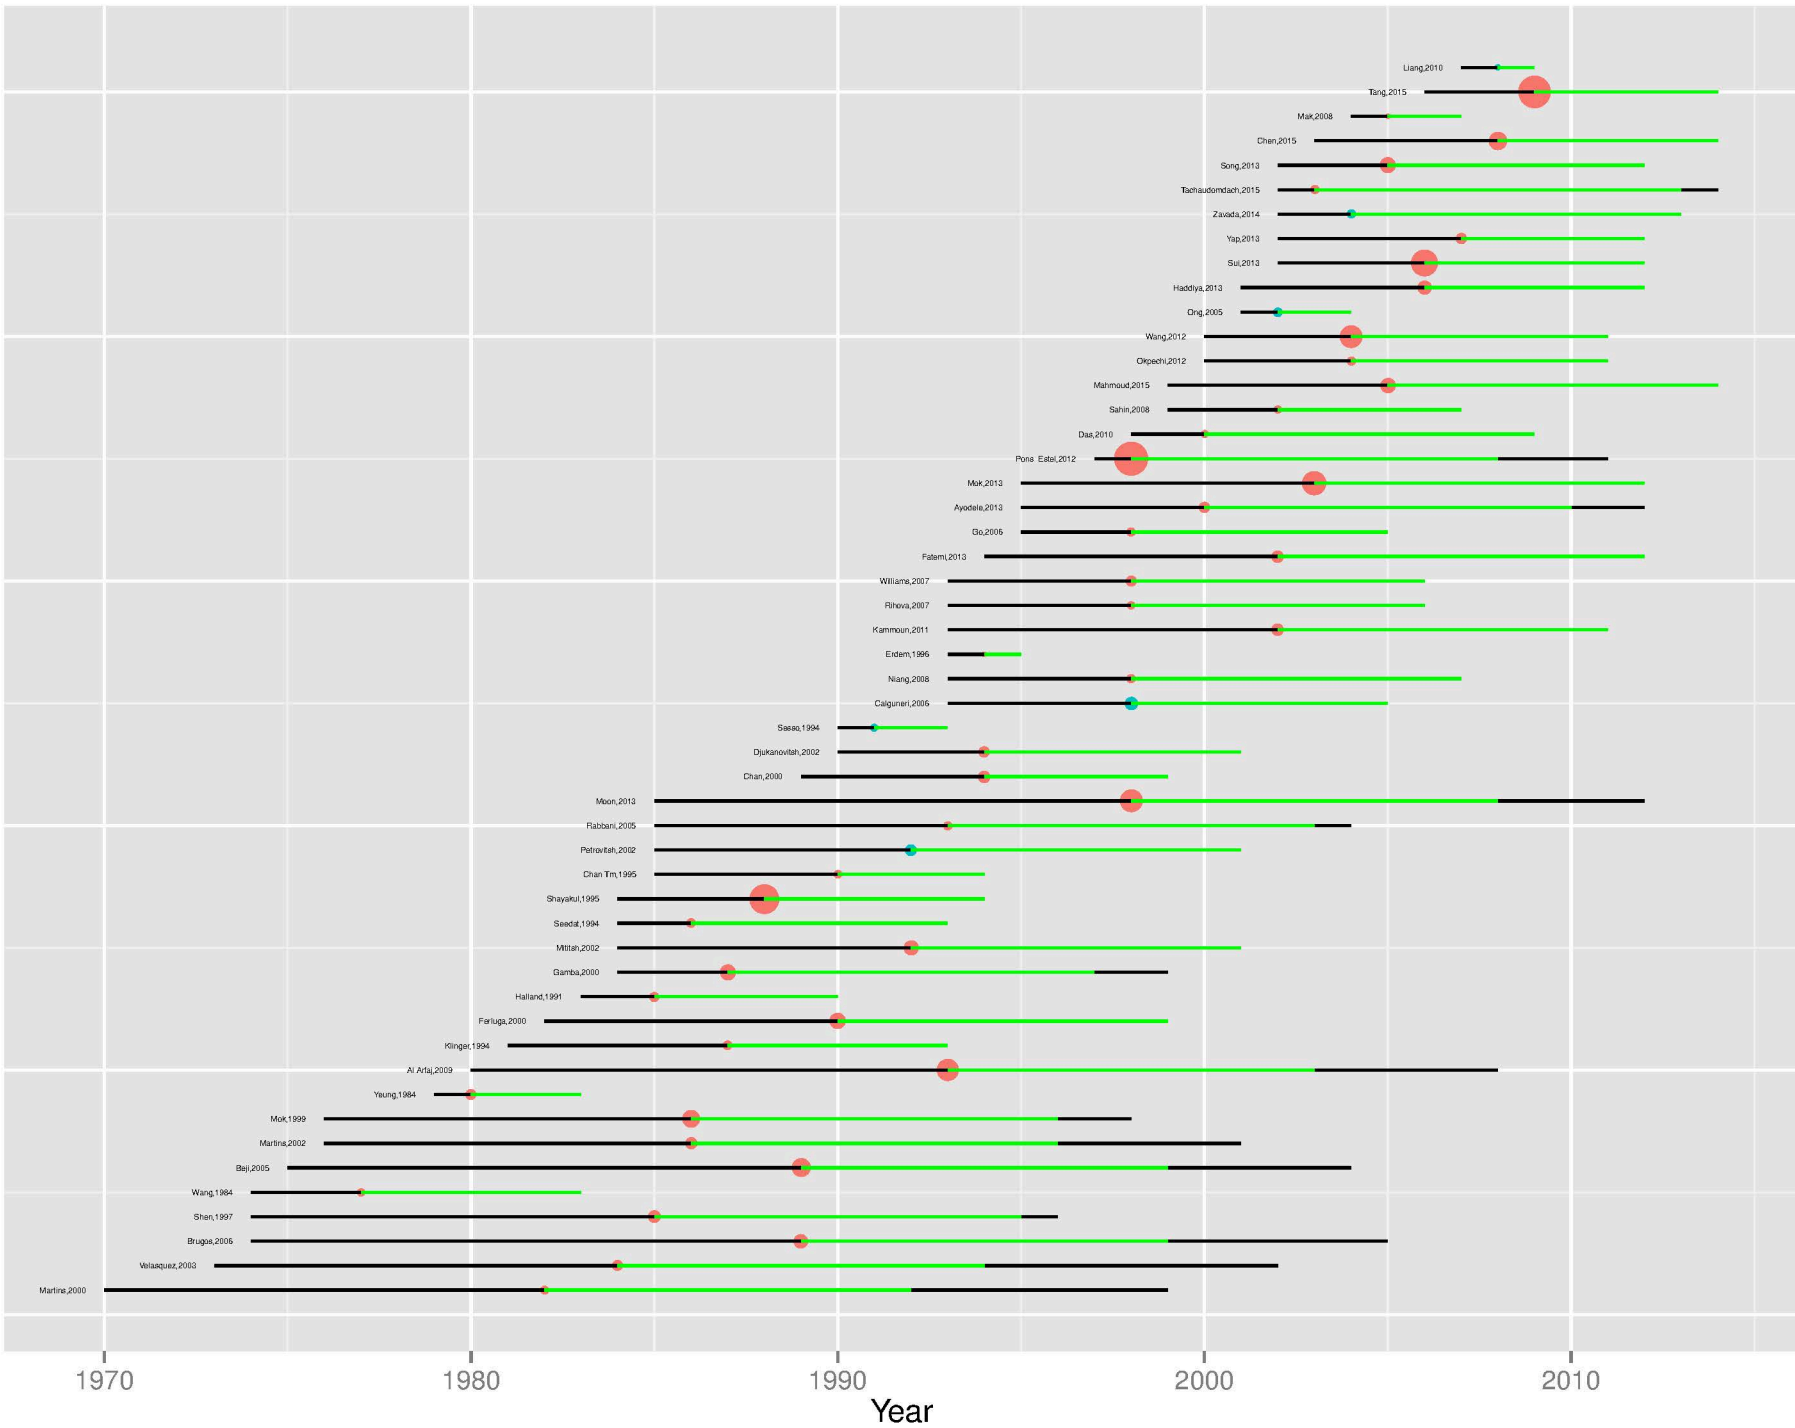

Design    ● Observational    ● Trial

Supplement: NIHMS822822-supplement-Sup_fig2b.pdf [file NIHMS822822-supplement-Sup_fig2b.pdf]

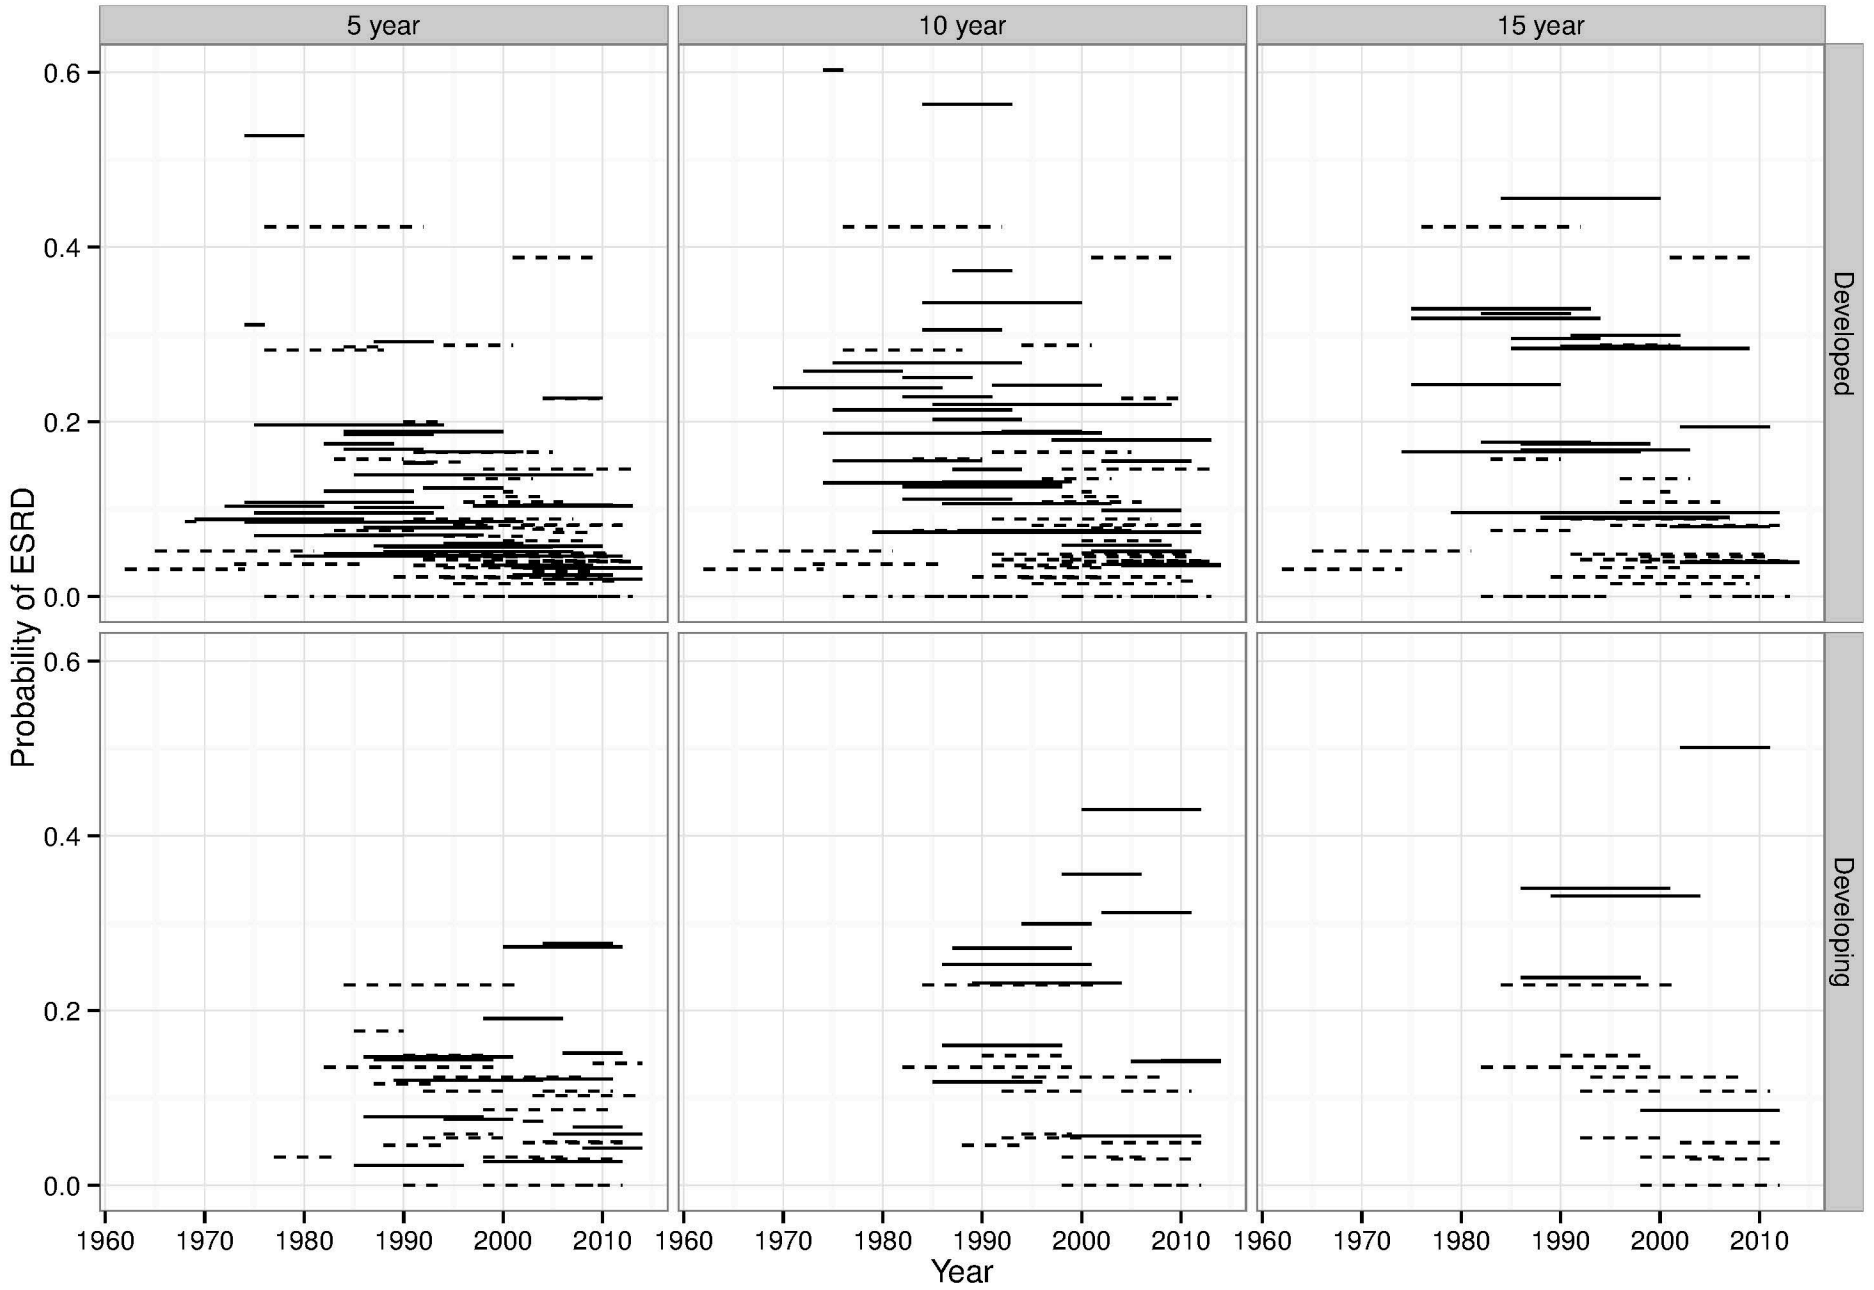

Supplement: NIHMS822822-supplement-Sup_fig3.pdf [file NIHMS822822-supplement-Sup_fig3.pdf]

5 year

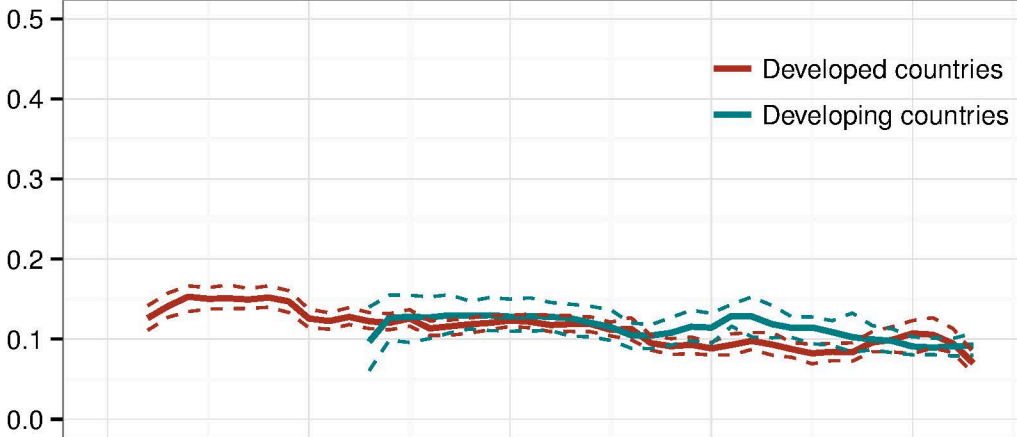

10 year

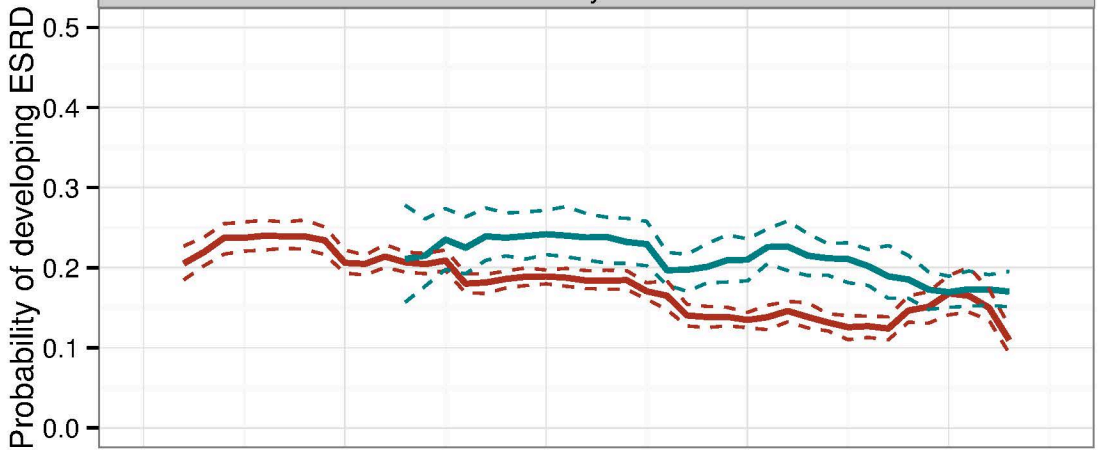

15 year

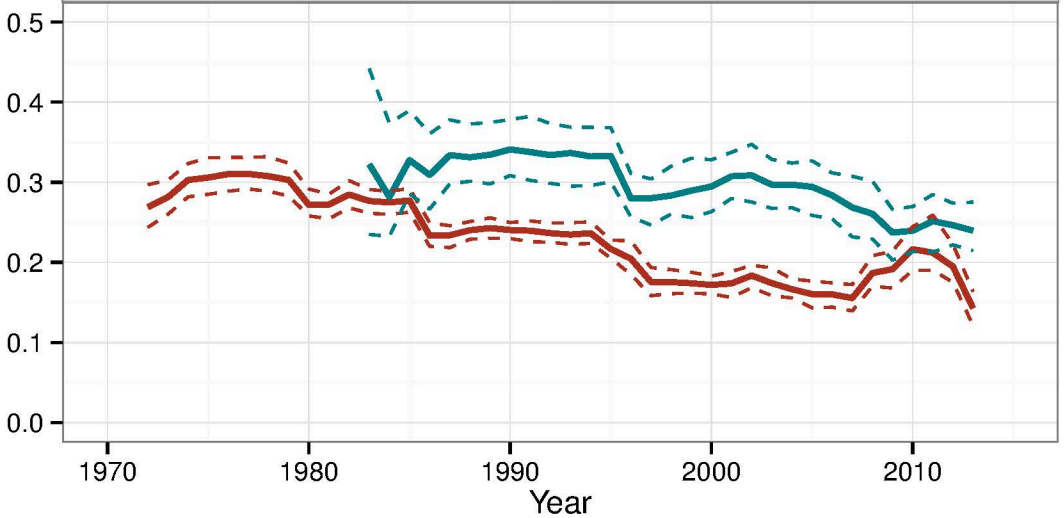

Supplement: NIHMS822822-supplement-Sup_fig4.pdf [file NIHMS822822-supplement-Sup_fig4.pdf]

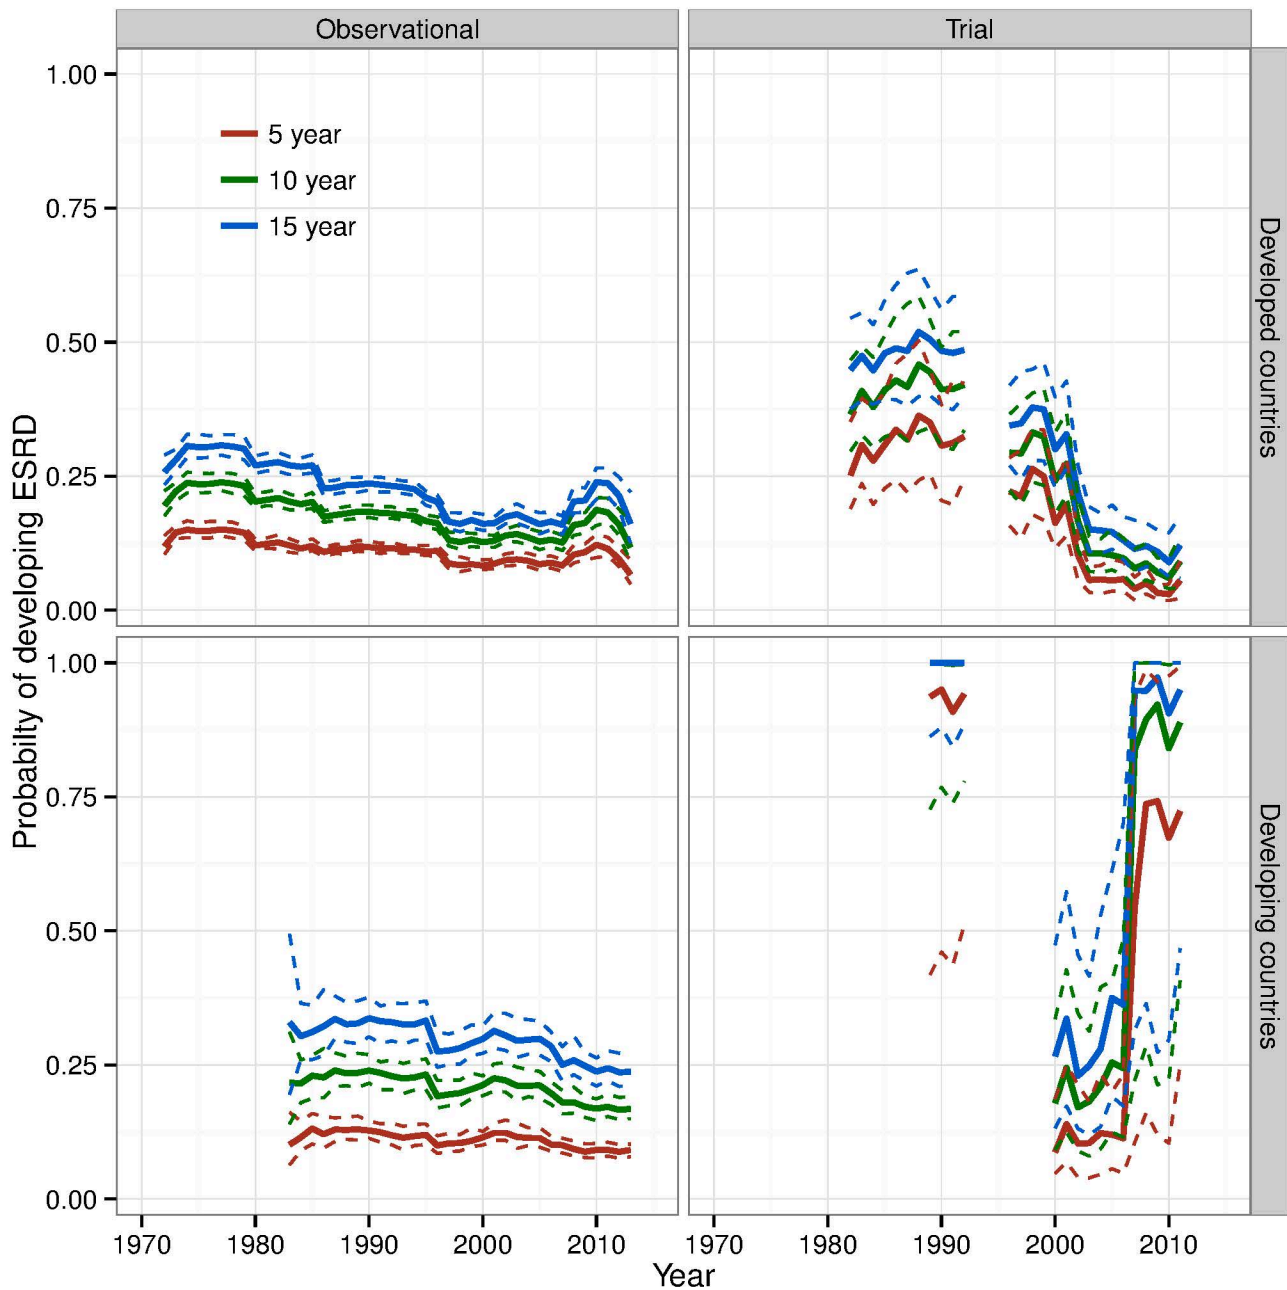

Supplement: NIHMS822822-supplement-Sup_fig5.pdf [file NIHMS822822-supplement-Sup_fig5.pdf]

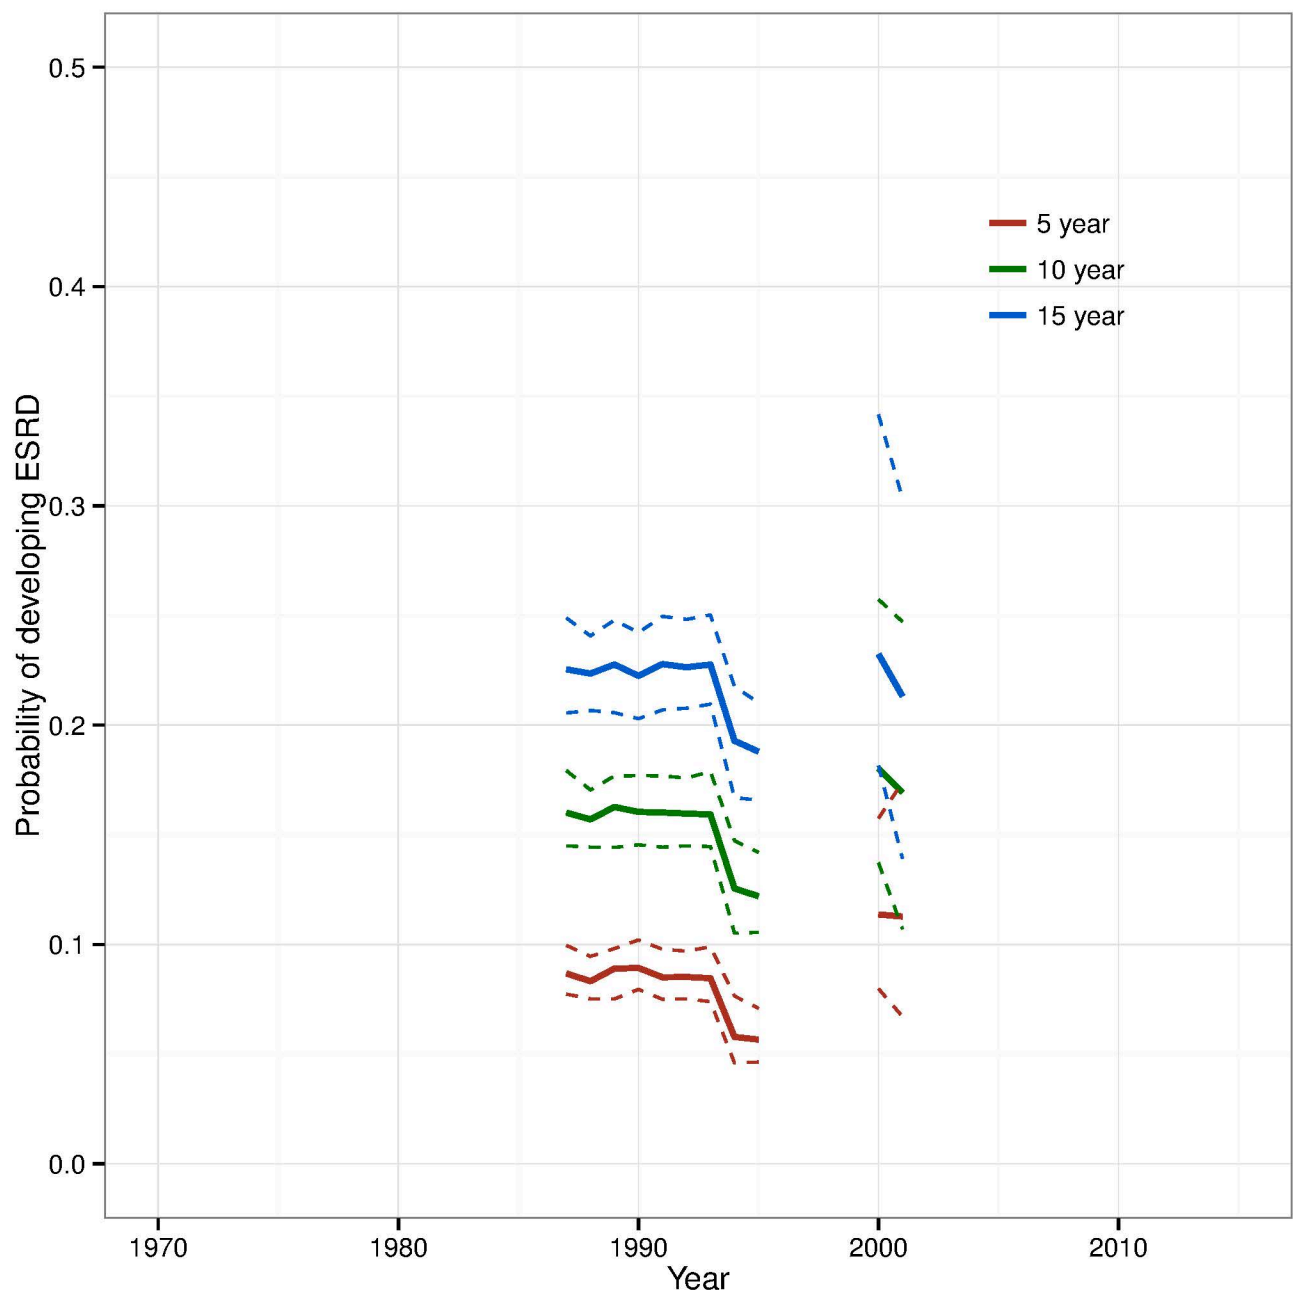

Supplement: NIHMS822822-supplement-Sup_fig6.pdf [file NIHMS822822-supplement-Sup_fig6.pdf]

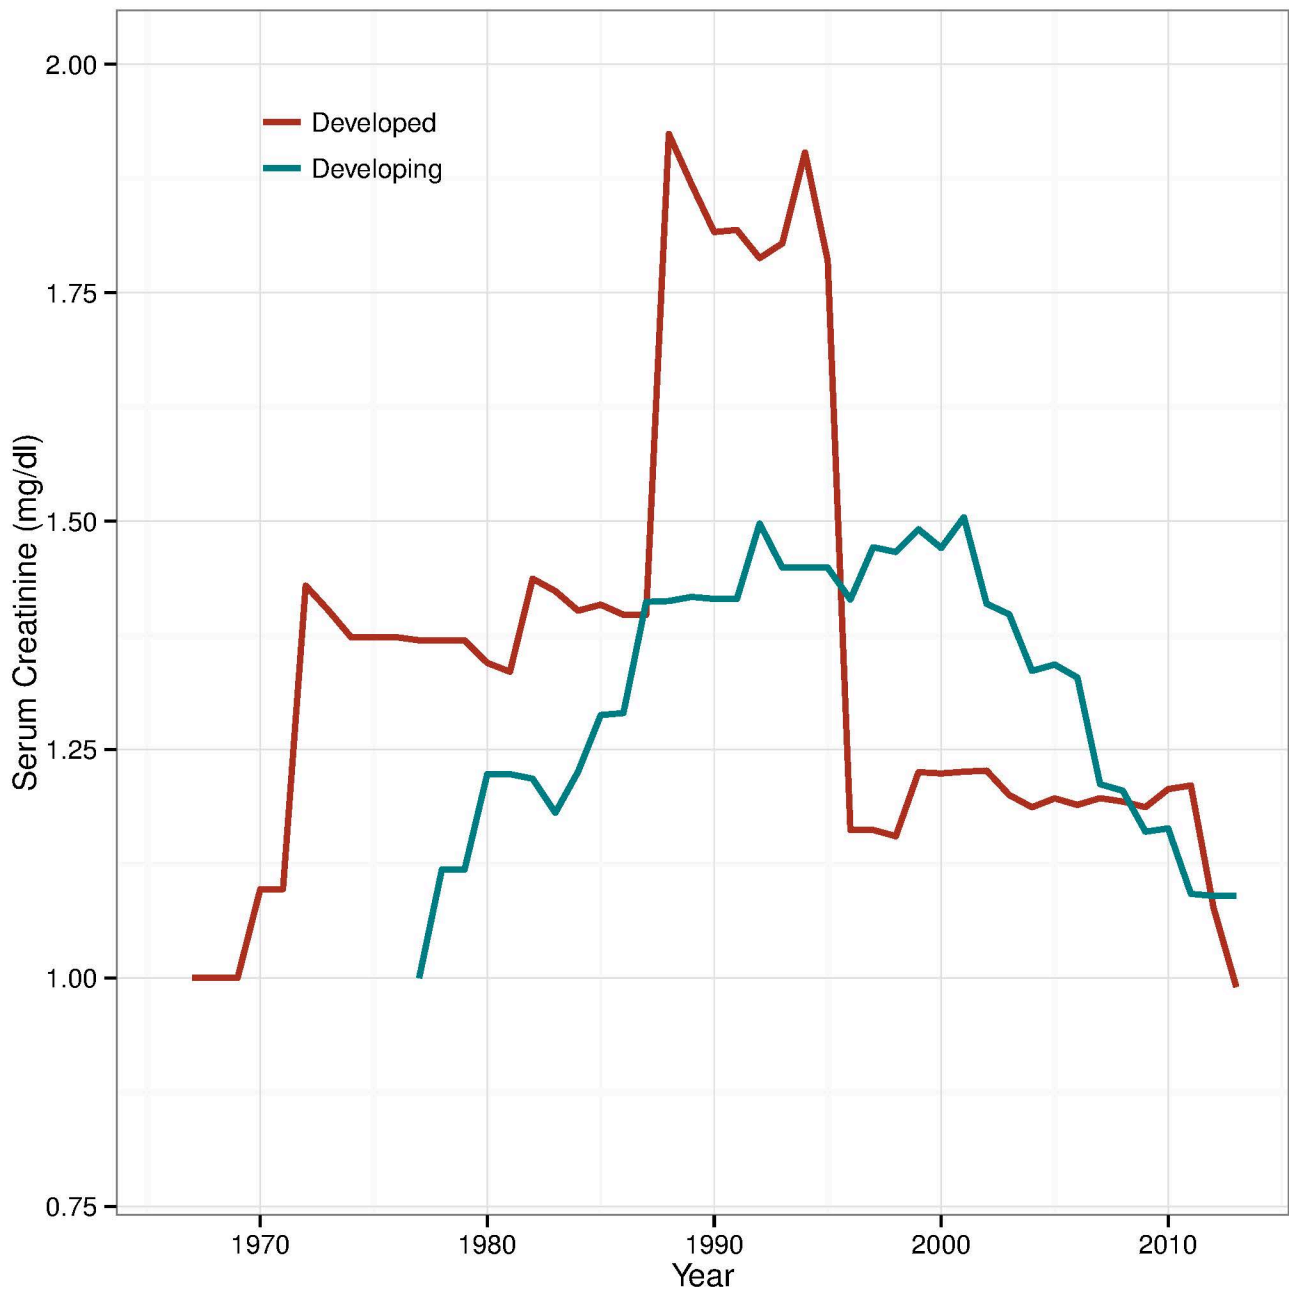

Supplement: NIHMS822822-supplement-Sup_fig7a.pdf [file NIHMS822822-supplement-Sup_fig7a.pdf]

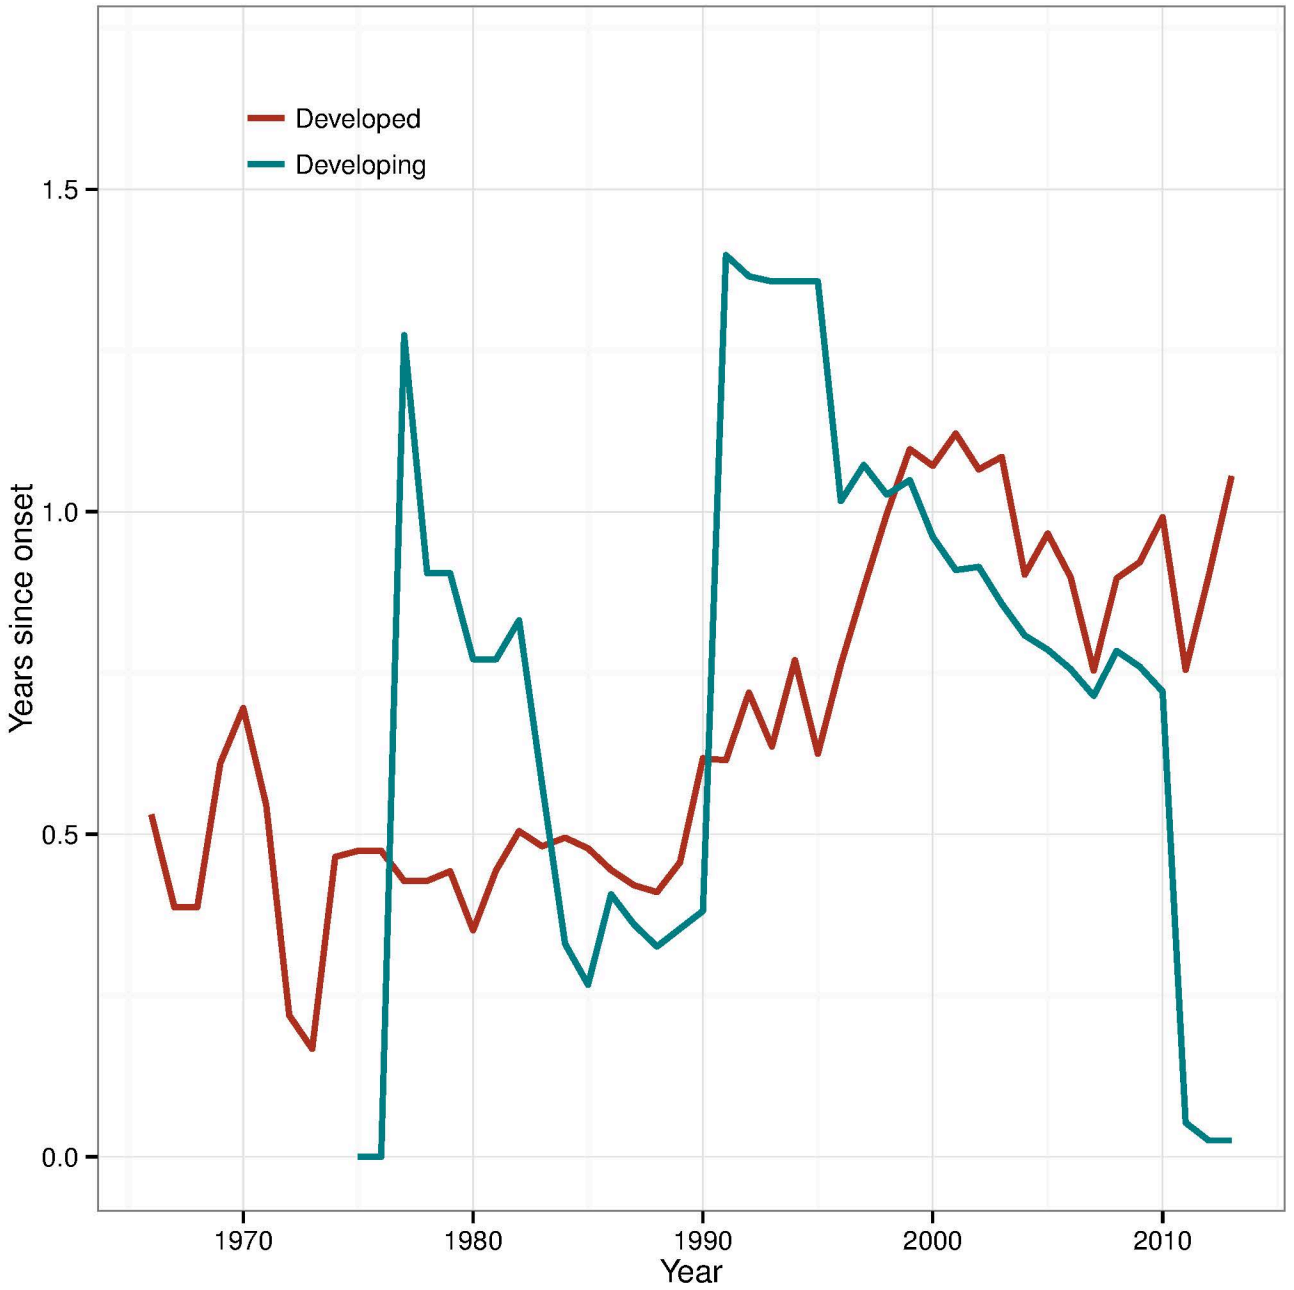

Supplement: NIHMS822822-supplement-Sup_fig7b.pdf [file NIHMS822822-supplement-Sup_fig7b.pdf]

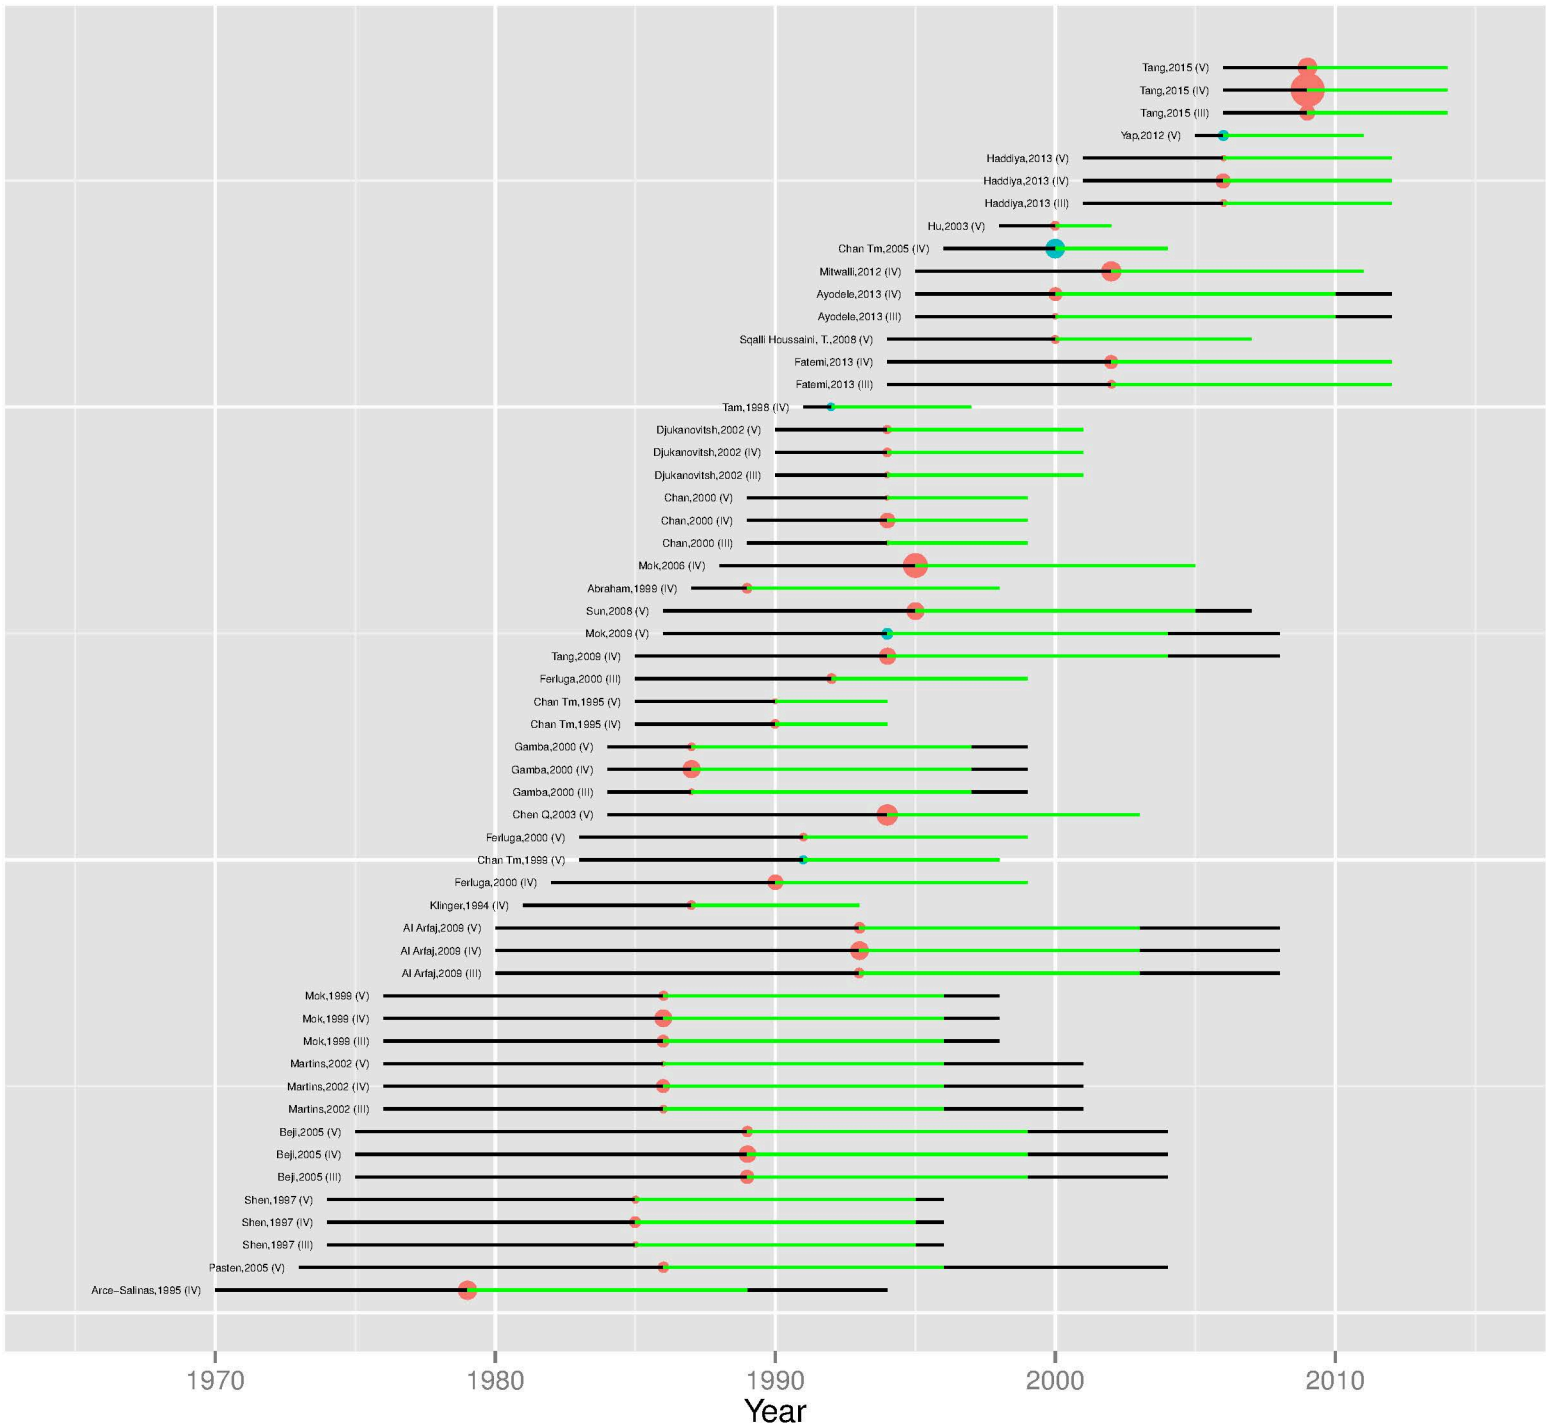

Design ● Observational ● Trial

Supplement: NIHMS822822-supplement-sup_fig8b.pdf [file NIHMS822822-supplement-sup_fig8b.pdf]
